# Supplementary material
Source: ML conference proceedings conference paper supplement (https://openaccess.thecvf.com/content/ICCV2025/html/Swanson_Super_Resolved_Imaging_ICCV_2025_paper.html)
Supplement: Supplementary file 1 [file Swanson_Super_Resolved_Imaging_ICCV_2025_supplemental.pdf]

# Super Resolved Imaging with Adaptive Optics:

## Supplemental Document

Robin Swanson<sup>1,2</sup> Esther Y. H. Lin<sup>1</sup> Masen Lamb<sup>3,4</sup> Suresh Sivanandam<sup>1,2</sup> Kiriakos N. Kutulakos<sup>1</sup>

<sup>1</sup> University of Toronto <sup>2</sup> Dunlap Institute for Astronomy & Astrophysics

<sup>3</sup> International Gemini Observatory <sup>4</sup> University of Victoria

### 8. The Shack-Hartmann Wavefront Sensor

Here we include additional details on the operation of the Shack-Hartmann Wavefront Sensor (SHWFS) in Fig. 9 and how a new flat is applied to the AO system in Fig. 10.

### 9. Simulation Settings

| Simulation Parameters  |                      | Values                       |
|------------------------|----------------------|------------------------------|
| Telescope              | Diameter             | 8 m                          |
|                        | Sampling Frequency   | 800 Hz                       |
|                        | WFS Order            | $16 \times 16$               |
|                        | WFS Readout Noise    | $\approx 0e^-$               |
|                        | DM Order             | $17 \times 17$               |
|                        | NGS Band             | R                            |
|                        | NGS Magnitude        | $\mathcal{U}(8, 16)$         |
| Three Layer Atmosphere | POL Gain             | 0.35                         |
|                        | $r_0$                | $\mathcal{N}(0.15, 0.02)$ cm |
|                        | Layers               | 3                            |
|                        | Altitudes            | 0 km                         |
|                        |                      | 4 km                         |
|                        |                      | 10 km                        |
|                        | Fractional $r_0$     | 0.70                         |
|                        |                      | 0.25                         |
|                        |                      | 0.05                         |
|                        | Wind Speeds          | $\mathcal{N}(5, 2.5)$ km/s   |
|                        |                      | $\mathcal{N}(10, 5)$ km/s    |
|                        |                      | $\mathcal{N}(25, 10)$ km/s   |
| Science Camera         | Wind Directions      | $\mathcal{U}[0, 2\pi)$ rad   |
|                        | Science Camera Band  | K                            |
|                        | Science Camera Noise | 1% Max Value                 |

Table 2. Simulation parameters used for generating point spread functions and the training of our reconstruction methods.

### 10. Experimental Calibration

To calibrate the modal power needed to match simulation and experiment, we simply induce a change to the flat with

a single mode applied with different amounts of power. We can then compare the output from our forward model with varying amounts of the same mode and find the scalar value that best matches. This process can be repeated for any number of modes to ensure linearity across each mode and their power. As previously mentioned, the PWFS response is linear only about some working point and so this may be more important when using one compared to the SHWFS used in these experiments.

We also use test-time augmentation in order to re-normalize the network and match the new experimental data distribution. We employed a modified version of the popular TENT [61] algorithm where only the batch-normalization scalers are updated using cropped areas of the input data and their bilinear-upsampled values as input/training pairs.

### 11. Additional Experimental Results

Here we include additional simulated results in Fig. 11 as well as the larger, uncropped experimental results from Sec. 6.1 in Fig. 12.

Corresponding author: [robin@cs.toronto.edu](mailto:robin@cs.toronto.edu)  
Project website: [www.cs.toronto.edu/~robin/aosr](http://www.cs.toronto.edu/~robin/aosr)

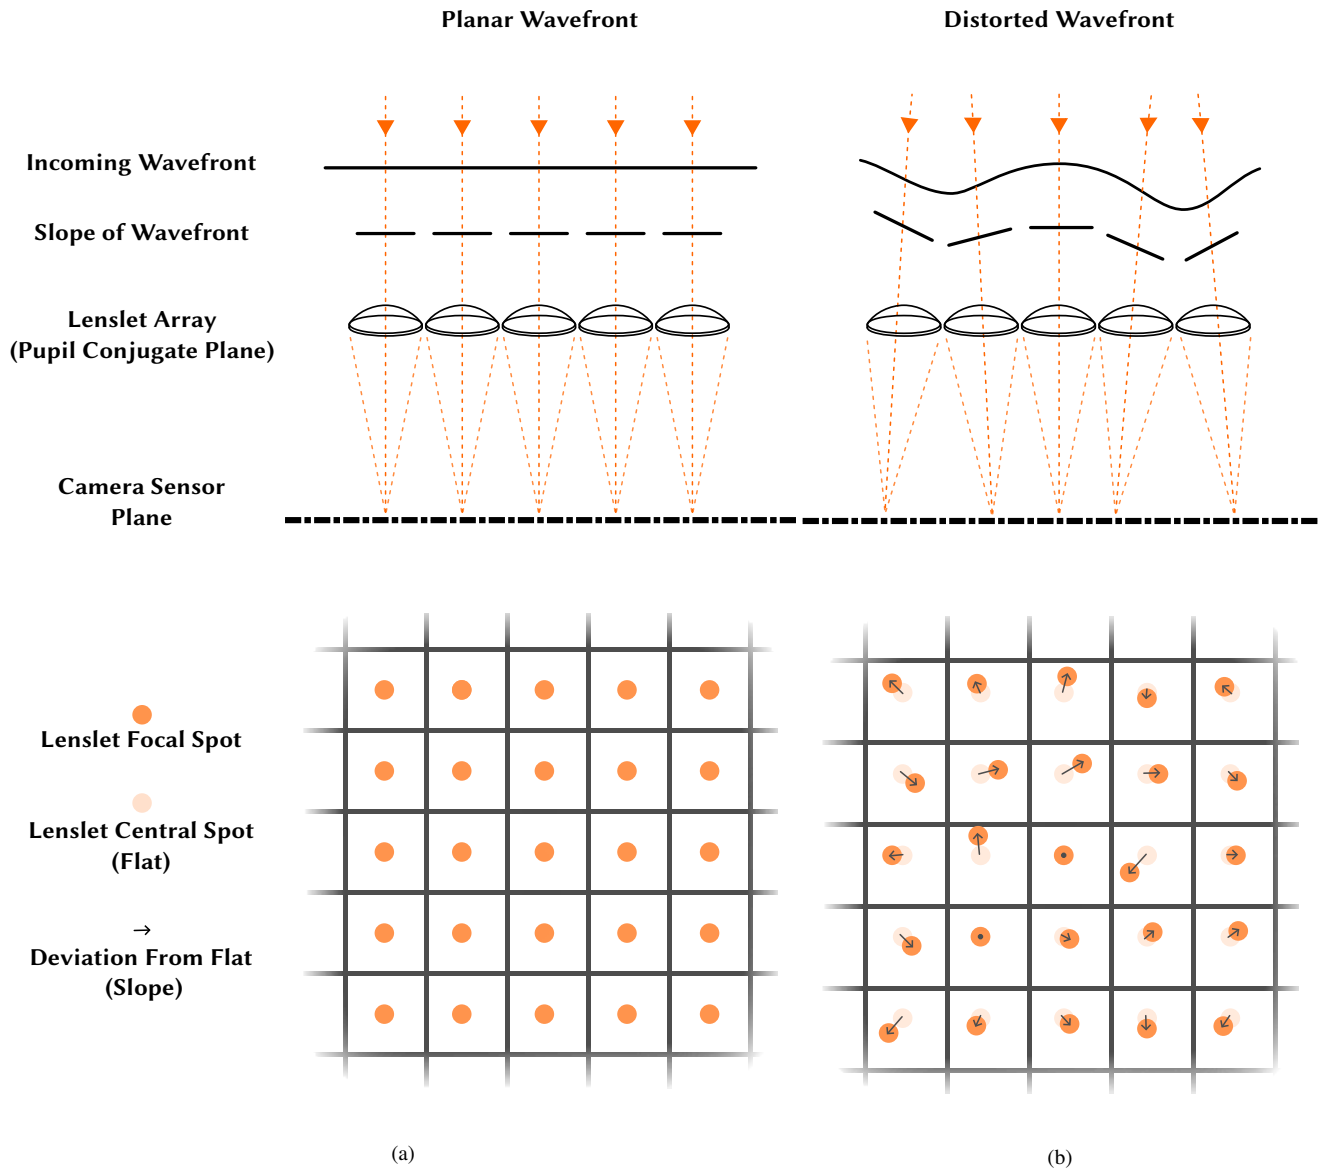

Figure 9. *Basic working principles of the Shack-Hartmann Wavefront Sensor.* If a perfectly flat wavefront reaches the SHWFS (a), each lenslet will focus the guide star as a point in the middle of its corresponding pixel grid. Any deviation to the wavefront (b) will result in an  $x$  and/or  $y$  shift in the sensor plane. These deviations directly correspond to the  $x$  and  $y$  “slope” (first derivative) of the wavefront.

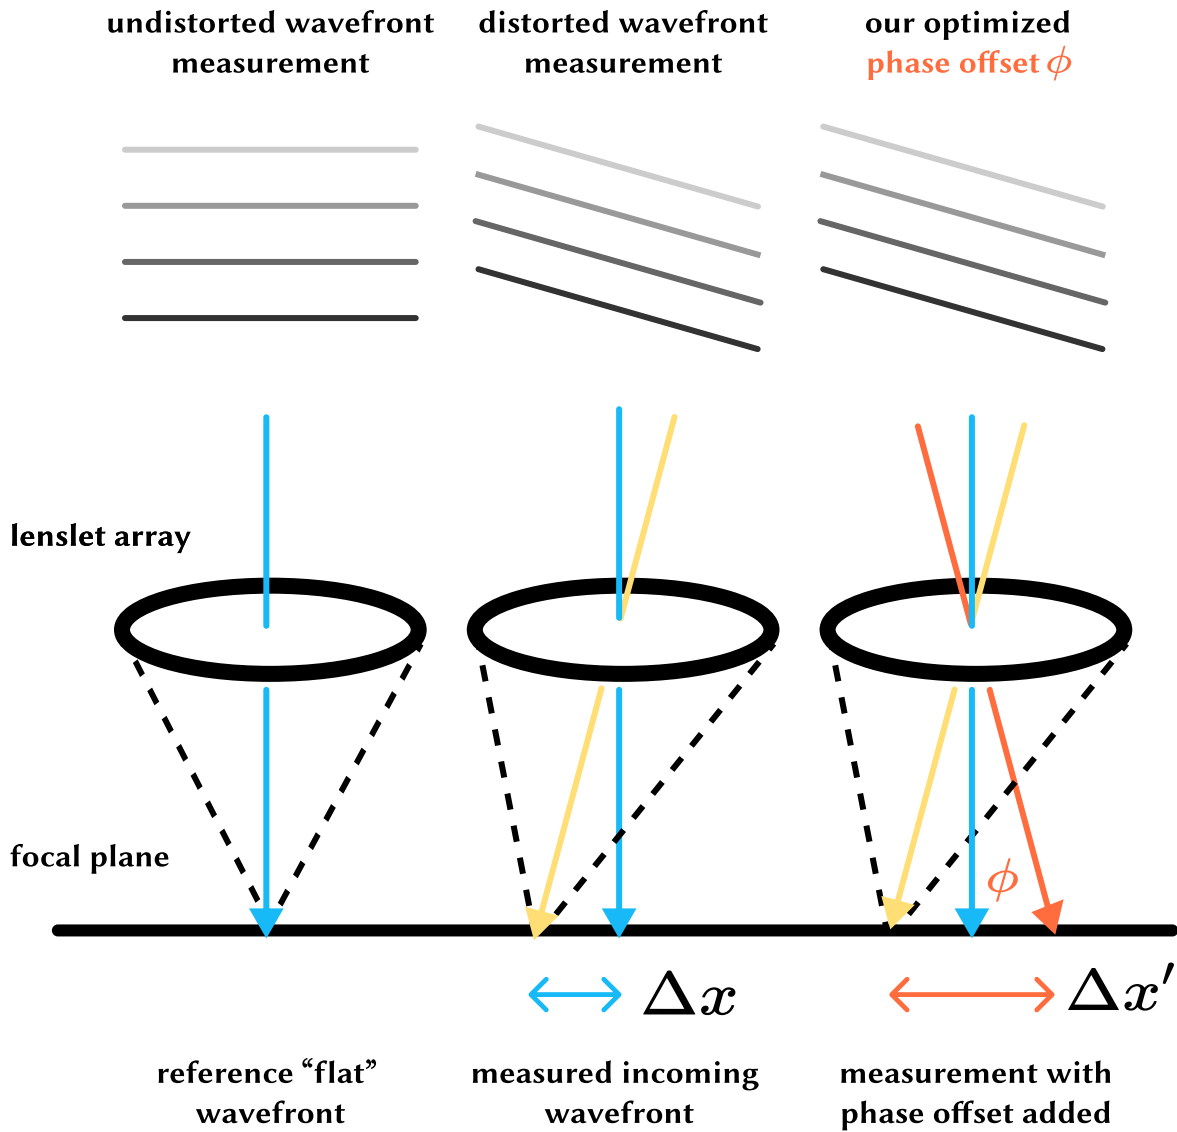

Figure 10. *The Shack-Hartmann Wavefront Sensor (SHWFS)*: Wavefront distortions can be measured by focusing incoming light to a point and measuring its (x,y) position with respect to a reference "flat" position. Using a grid of lenslets, the SHWFS can spatially sample the wavefront across the entire image sensor. This signal is sent to the control system which determines the ideal mirror positions to remove the deviations. Our method changes the reference positions, applying a small offset to each lenslet, inducing an optimized phase shift on the mirror.

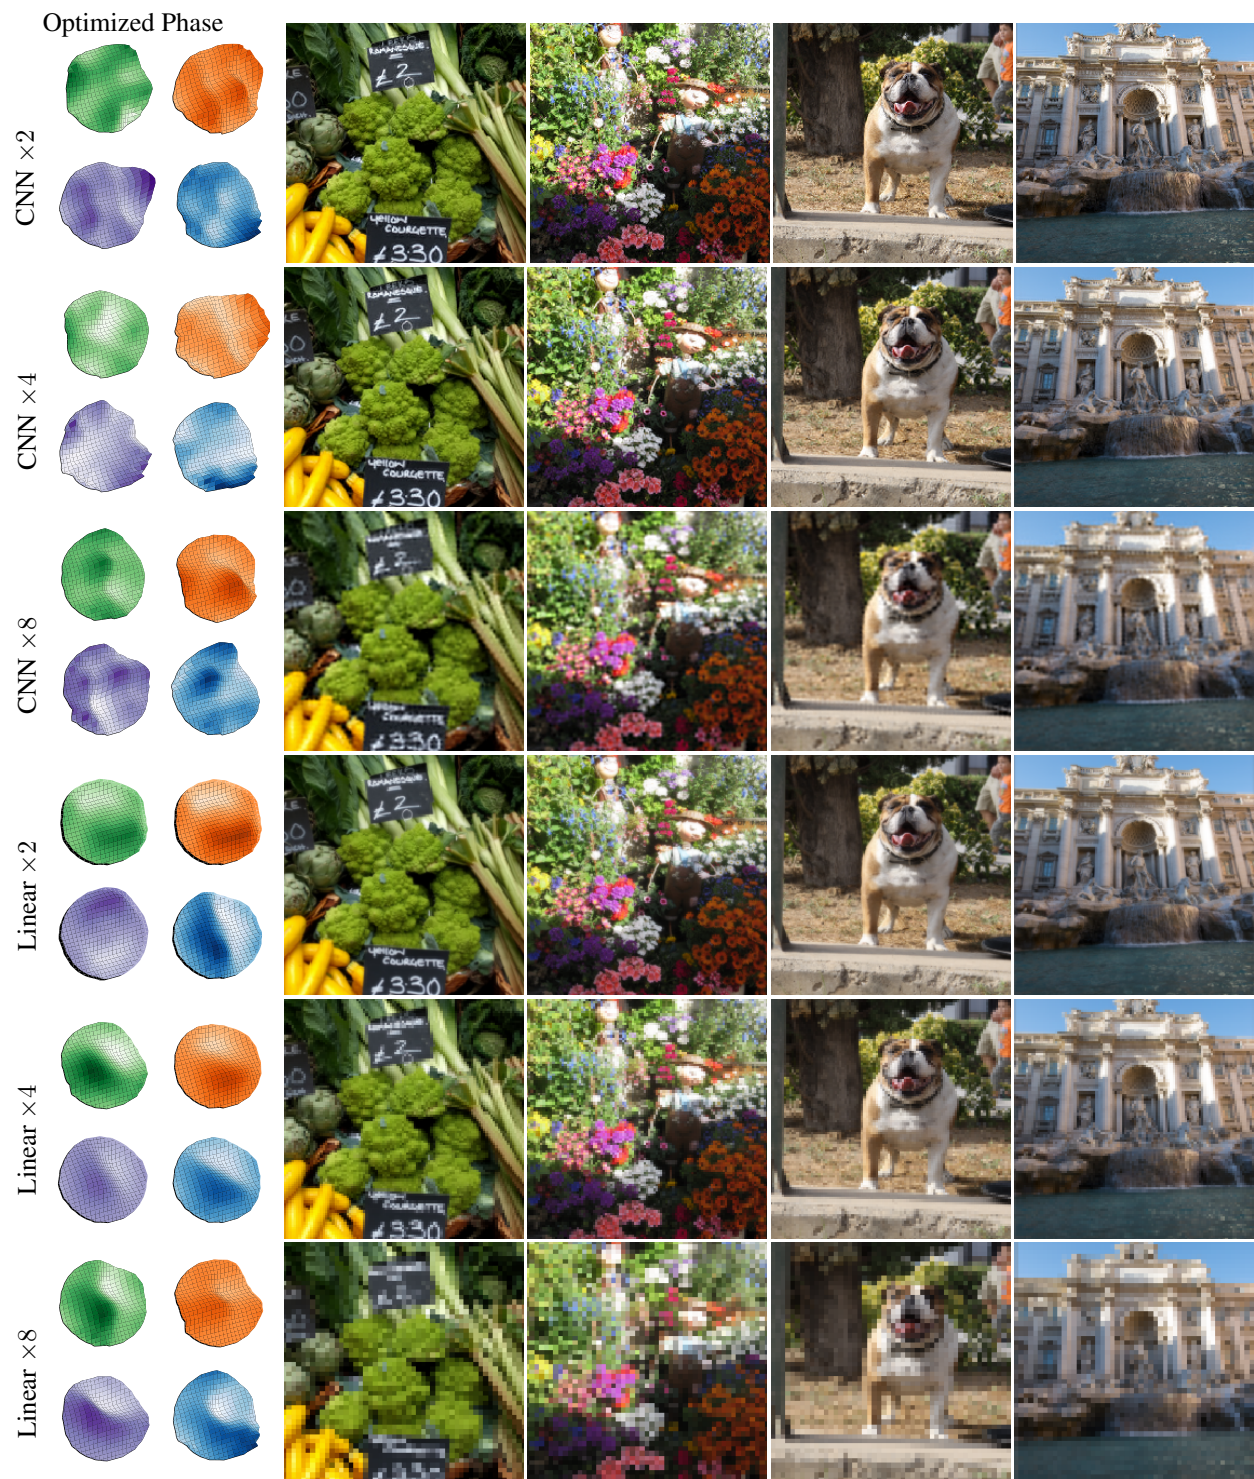

Figure 11. Simulated Scaled Results with 4 Sub-Exposures from the PIRM Dataset

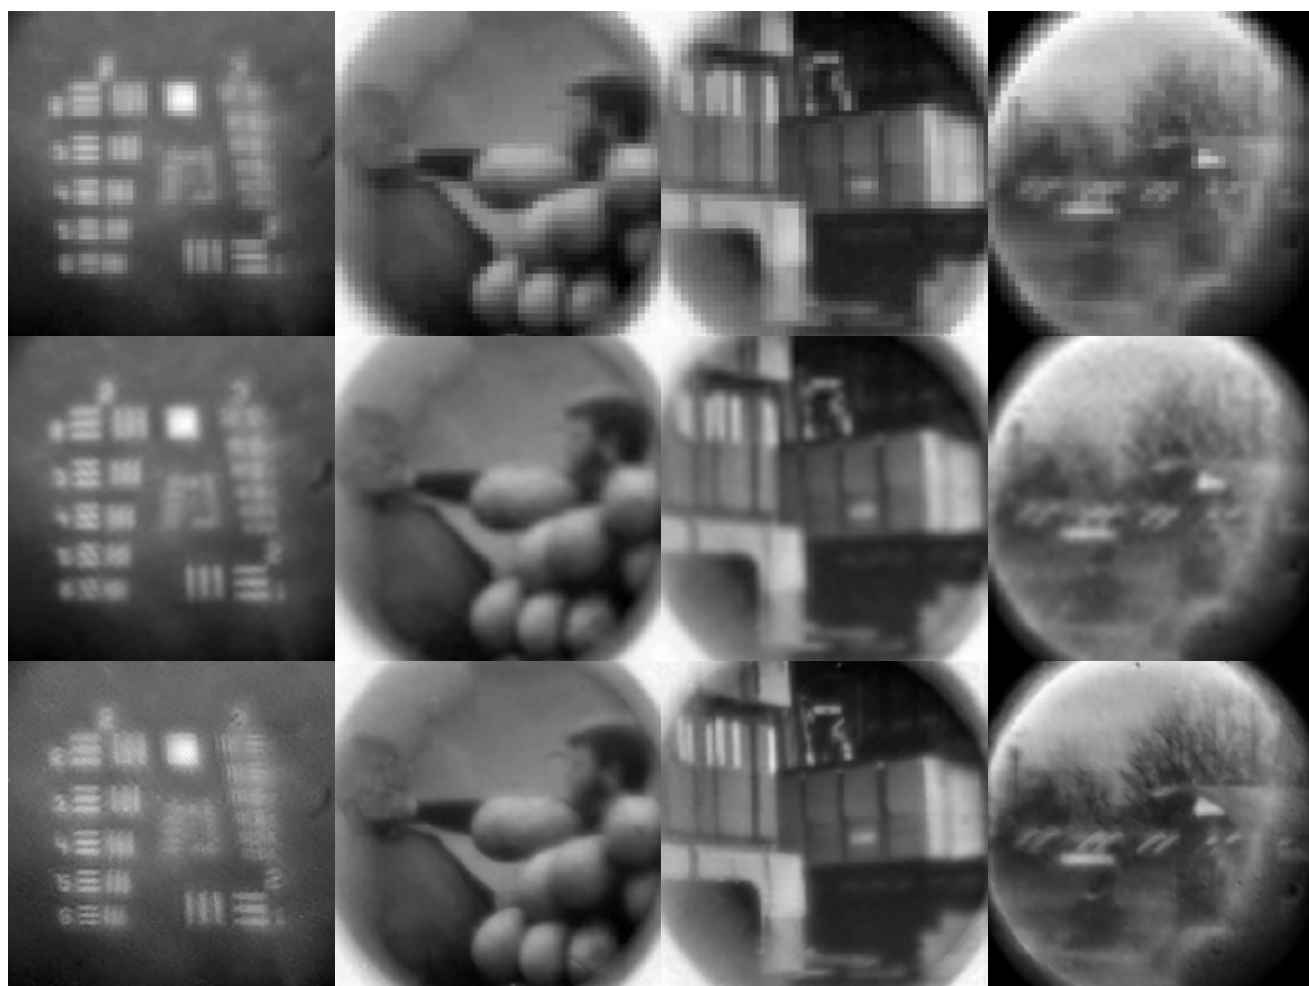

Figure 12. *Uncropped Experimental Results.*
